# Supplementary material
Source: publisher figshare collection journal article supplement (https://tandf.figshare.com/articles/dataset/_/11417589)
Supplement: Supplementary file 1 [file 1]

## Supplementary 1, search strategy

### Search strategy in PubMed

"Dipeptidyl-Peptidase IV Inhibitors"[Mesh]) OR Dipeptidyl-Peptidase IV Inhibitors OR Dipeptidyl Peptidase IV Inhibitors OR DPP 4 inhibitors OR DPP-IV inhibitors OR DPP-4 inhibitors OR DPP IV inhibitors OR Dipeptidyl Peptidase 4 Inhibitors OR Dipeptidyl-Peptidase 4 Inhibitors

OR

"alogliptin"[Supplementary Concept] OR oseni OR kazano OR nesina OR vipidia OR vipdomet OR Alogliptin

"anagliptin"[Supplementary Concept]) OR metoana OR anagliptin

"LC15-0444"[Supplementary Concept] OR gemigliptin

"Linagliptin"[Mesh] OR glyxambi OR jentaducto OR tradjenta

"2-(2,5-difluorophenyl)-5-(2-(methylsulfonyl)-2,6-dihydropyrrolo(3,4-c)pyrazol-5(4H)-yl)tetrahydro-2H-pyran-3-amine"[Supplementary Concept] OR omarigliptin

"saxagliptin"[Supplementary Concept]) OR kombiglyze OR onglyza OR qtern

"Sitagliptin Phosphate"[Mesh] OR Janumet OR Januvia OR juvisync OR steglujan OR janacti OR tesavel OR xelvia OR effcib OR velmetia OR ristfor OR ristaben

("3-(4-(4-(3-methyl-1-phenyl-1H-pyrazol-5-yl)piperazin-1-yl)pyrrolidin-2-ylcarbonyl)thiazolidine"[Supplementary Concept]) OR teneligliptin))

"Vildagliptin"[Mesh] OR galvus OR jalra OR xiliarx OR eucreas OR icandra OR zomarist OR Vildagliptin

OR "Glucagon-Like Peptide 1"[Mesh] OR glucagon like peptide 1 receptor agonist OR glucagon-like peptide 1 receptor agonist OR glucagon-like peptide 1 agonist OR glucagon like peptide 1 agonist OR GLP-1 agonist OR GLP-1 receptor agonist OR GLP-1 Ra

OR

"rGLP-1 protein"[Supplementary Concept] OR Albiglutide OR tanzeum OR eperzan

"Exenatide"[Mesh] OR budureon OR byetta OR Exenatide

"dulaglutide"[Supplementary Concept] OR Trulicity OR Dulaglutide

"semaglutide"[Supplementary Concept] OR ozempic OR Semaglutide

"Liraglutide"[Mesh] OR Victoza OR saxenda OR xultophy OR levemir OR Liraglutide

"lixisenatide"[Supplementary Concept] OR adlyxin OR soliqua OR lyxumia OR suliqua OR Lixisenatide

"taspoglutide"[Supplementary Concept] OR taspoglutide  
benaglutide

AND "Diabetes, Gestational"[Mesh] OR Gestational Diabetes Mellitus OR Gestational Diabetes OR Pregnancy-Induced Diabetes OR pregnant OR GDM

AND "randomized controlled trial"[pt] OR "controlled clinical trial"[pt] OR randomized[tiab] OR placebo[tiab] OR "drug therapy"[sh] OR randomly[tiab] OR trial[tiab] OR groups[tiab]

**RCT filter from:** <https://guides.library.harvard.edu/c.php?g=309982&p=2079544>

## Search strategy in EMBASE

|     |                                                                                                                                                                                                                                                                                                  |
|-----|--------------------------------------------------------------------------------------------------------------------------------------------------------------------------------------------------------------------------------------------------------------------------------------------------|
| #1  | 'taspoglutide'/exp OR 'taspoglutide'                                                                                                                                                                                                                                                             |
| #2  | 'exendin 4'/exp OR 'budureon' OR 'byetta' OR 'exenatide'                                                                                                                                                                                                                                         |
| #3  | 'lixisenatide'/exp OR 'lixisenatide' OR 'adlyxin' OR 'soliqua' OR 'lyxumia' OR 'suliqua'                                                                                                                                                                                                         |
| #4  | 'albiglutide'/exp OR 'albiglutide' OR 'tanzeum' OR 'eperzan'                                                                                                                                                                                                                                     |
| #5  | 'liraglutide'/exp OR 'liraglutide' OR 'victoza' OR 'saxenda' OR 'xultophy' OR 'levemir'                                                                                                                                                                                                          |
| #6  | 'dulaglutide'/exp OR 'dulaglutide' OR 'trulicity'                                                                                                                                                                                                                                                |
| #7  | 'semaglutide'/exp OR 'semaglutide' OR 'ozempic'                                                                                                                                                                                                                                                  |
| #8  | benaglutide                                                                                                                                                                                                                                                                                      |
| #9  | #1 OR #2 OR #3 OR #4 OR #5 OR #6 OR #7 OR #8                                                                                                                                                                                                                                                     |
| #10 | 'glucagon like peptide 1 receptor agonist'/exp OR 'glucagon like peptide 1 receptor agonist'<br>OR 'glucagon-like peptide 1 receptor agonist' OR 'glucagon-like peptide 1 agonist'<br>OR 'glucagon like peptide 1 agonist' OR 'glp-1 agonist' OR 'glp-1 receptor agonist' OR 'glp-1 ra'          |
| #11 | #9 OR #10                                                                                                                                                                                                                                                                                        |
| #12 | 'alogliptin'/exp OR 'alogliptin' OR 'oseni' OR 'kazano' OR 'nesina' OR 'vipidia' OR 'vipdomet'                                                                                                                                                                                                   |
| #13 | 'anagliptin'/exp OR 'anagliptin' OR 'metoana'                                                                                                                                                                                                                                                    |
| #14 | 'linagliptin'/exp OR 'linagliptin' OR 'glyxambi' OR 'jentaducto' OR 'tradjenta'                                                                                                                                                                                                                  |
| #15 | 'saxagliptin'/exp OR 'saxagliptin' OR 'kombiglyze' OR 'onglyza' OR 'qtern'                                                                                                                                                                                                                       |
| #16 | 'sitagliptin'/exp OR 'sitagliptin' OR 'janumet' OR 'januvia' OR 'juvisync' OR 'steglujan' OR 'janacti' OR 'tesavel'<br>OR 'xelevia' OR 'efficib' OR 'velmetia' OR 'ristfor' OR 'ristaben'                                                                                                        |
| #17 | 'vildagliptin'/exp OR 'vildagliptin' OR 'galvus' OR 'jalra' OR 'xiliarx' OR 'eucreas' OR 'icandra' OR 'zomarist'                                                                                                                                                                                 |
| #18 | 'gemigliptin'/exp OR 'gemigliptin' OR 'omarigliptin'/exp OR 'omarigliptin'<br>OR 'teneligliptin'/exp OR 'teneligliptin'                                                                                                                                                                          |
| #19 | #12 OR #13 OR #14 OR #15 OR #16 OR #17 OR #18                                                                                                                                                                                                                                                    |
| #20 | 'dipeptidyl peptidase iv inhibitor'/exp OR 'dipeptidyl peptidase iv inhibitor'<br>OR 'dipeptidyl-peptidase iv inhibitor' OR 'dipeptidyl-peptidase 4 inhibitor'<br>OR 'dipeptidyl peptidase 4 inhibitor' OR 'dpp 4 inhibitor' OR 'dpp-4 inhibitor'<br>OR 'dpp-iv inhibitor' OR 'dpp iv inhibitor' |
| #21 | #19 OR #20                                                                                                                                                                                                                                                                                       |
| #22 | #11 OR #21                                                                                                                                                                                                                                                                                       |
| #23 | 'pregnancy diabetes mellitus'/exp OR 'gestational diabetes mellitus' OR 'gestational diabetes'<br>OR 'pregnancy-induced diabetes' OR 'pregnant' OR 'GDM'                                                                                                                                         |
| #24 | #22 AND #23                                                                                                                                                                                                                                                                                      |
| #25 | 'randomized controlled trial'/exp OR 'controlled clinical trial'/exp OR randomized:ti,ab OR placebo:ti,ab<br>OR 'drug therapy':lnk OR randomly:ti,ab OR trial:ti,ab OR groups:ti,ab                                                                                                              |
| #26 | #24 AND #25                                                                                                                                                                                                                                                                                      |

RCT filter from: <https://guides.library.harvard.edu/c.php?g=309982&p=2079544>

## Search strategy in Cochrane Library

|     |                                                                                                                                                                                                                                          |
|-----|------------------------------------------------------------------------------------------------------------------------------------------------------------------------------------------------------------------------------------------|
| #1  | MeSH descriptor: [Liraglutide] explode all trees                                                                                                                                                                                         |
| #2  | (Liraglutide):ti,ab,kw OR (Victoza):ti,ab,kw OR (saxenda):ti,ab,kw<br>OR (xultophy):ti,ab,kw OR (levemir):ti,ab,kw                                                                                                                       |
| #3  | (Albiglutide):ti,ab,kw OR (tanzeum):ti,ab,kw OR (eperzan):ti,ab,kw                                                                                                                                                                       |
| #4  | (Exenatide):ti,ab,kw OR (budureon):ti,ab,kw OR (byetta):ti,ab,kw                                                                                                                                                                         |
| #5  | (dulaglutide):ti,ab,kw OR (Trulicity):ti,ab,kw                                                                                                                                                                                           |
| #6  | (semaglutide):ti,ab,kw OR (ozempic):ti,ab,kw                                                                                                                                                                                             |
| #7  | (lixisenatide):ti,ab,kw OR (adlyxin):ti,ab,kw OR (soliqua):ti,ab,kw<br>OR (lyxumia):ti,ab,kw OR (suliqua):ti,ab,kw                                                                                                                       |
| #8  | (taspoglutide):ti,ab,kw OR (benaglutide):ti,ab,kw (Word variations have been searched)                                                                                                                                                   |
| #9  | #1 OR #2 OR #3 OR #4 OR #5 OR #6 OR #7 OR #8                                                                                                                                                                                             |
| #10 | (glucagon like peptide 1 receptor agonist):ti,ab,kw OR (glucagon-like peptide 1 receptor<br>agonist):ti,ab,kw OR (glucagon-like peptide 1 agonist):ti,ab,kw OR (glucagon like<br>peptide 1 agonist):ti,ab,kw OR (GLP-1 agonist):ti,ab,kw |
| #11 | (GLP-1 receptor agonist):ti,ab,kw OR (GLP-1 Ra):ti,ab,kw                                                                                                                                                                                 |
| #12 | #10 OR #11                                                                                                                                                                                                                               |
| #13 | #9 OR #12                                                                                                                                                                                                                                |
| #14 | MeSH descriptor: [Dipeptidyl-Peptidase IV Inhibitors] explode all trees                                                                                                                                                                  |
| #15 | (Dipeptidyl-Peptidase IV Inhibitors):ti,ab,kw<br>OR (Dipeptidyl Peptidase IV Inhibitors):ti,ab,kw OR (DPP 4 inhibitors):ti,ab,kw<br>OR (DPP-IV inhibitors):ti,ab,kw OR (DPP-4 inhibitors):ti,ab,kw                                       |
| #16 | (DPP IV inhibitors):ti,ab,kw OR (Dipeptidyl Peptidase 4 Inhibitors):ti,ab,kw<br>OR (Dipeptidyl-Peptidase 4 Inhibitors):ti,ab,kw                                                                                                          |
| #17 | #14 OR #15 OR #16                                                                                                                                                                                                                        |
| #18 | (alogliptin):ti,ab,kw OR (oseni):ti,ab,kw OR (kazano):ti,ab,kw OR (nesina):ti,ab,kw OR<br>(vipidia):ti,ab,kw                                                                                                                             |
| #19 | (vipdomet):ti,ab,kw                                                                                                                                                                                                                      |
| #20 | (metoana):ti,ab,kw OR (anagliptin):ti,ab,kw                                                                                                                                                                                              |
| #21 | MeSH descriptor: [Linagliptin] explode all trees                                                                                                                                                                                         |
| #22 | (Linagliptin):ti,ab,kw OR (glyxambi):ti,ab,kw OR (jentaducto):ti,ab,kw<br>OR (tradjenta):ti,ab,kw                                                                                                                                        |
| #23 | (saxagliptin):ti,ab,kw OR (kombiglyze):ti,ab,kw OR (qtern):ti,ab,kw<br>OR (onglyza):ti,ab,kw                                                                                                                                             |
| #24 | MeSH descriptor: [Sitagliptin Phosphate] explode all trees                                                                                                                                                                               |
| #25 | (Sitagliptin):ti,ab,kw OR (Janumet):ti,ab,kw OR (Januvia):ti,ab,kw<br>OR (juvisync):ti,ab,kw OR (janacti):ti,ab,kw                                                                                                                       |
| #26 | (tesavel):ti,ab,kw OR (xelevia):ti,ab,kw OR (efficib):ti,ab,kw OR (velmetia):ti,ab,kw<br>OR (ristfor):ti,ab,kw                                                                                                                           |
| #27 | (ristaben):ti,ab,kw                                                                                                                                                                                                                      |
| #28 | (Vildagliptin):ti,ab,kw OR (galvus):ti,ab,kw OR (jalra):ti,ab,kw OR (xiliarx):ti,ab,kw<br>OR (eucreas):ti,ab,kw                                                                                                                          |
| #29 | (icandra):ti,ab,kw OR (zomarist):ti,ab,kw OR (teneligliptin):ti,ab,kw                                                                                                                                                                    |

|     |                                                                                                                                                               |
|-----|---------------------------------------------------------------------------------------------------------------------------------------------------------------|
|     | OR (omarigliptin):ti,ab,kw OR (gemigliptin):ti,ab,kw                                                                                                          |
| #30 | #18 OR #19 OR #20 OR #21 OR #22 OR #23 OR #24 OR #25 OR #26 OR #27 OR #28 OR #29                                                                              |
| #31 | #17 OR #30                                                                                                                                                    |
| #32 | MeSH descriptor: [Diabetes, Gestational] explode all trees                                                                                                    |
| #33 | (Gestational Diabetes Mellitus):ti,ab,kw OR (Gestational Diabetes):ti,ab,kw OR (Pregnancy-Induced Diabetes):ti,ab,kw OR (pregnant):ti,ab,kw OR (GDM):ti,ab,kw |
| #34 | #32 OR #33                                                                                                                                                    |
| #35 | #13 OR #31                                                                                                                                                    |
| #36 | #34 AND #35                                                                                                                                                   |
