# Supplementary material
Source: publisher figshare collection journal article supplement (https://tandf.figshare.com/articles/dataset/_/11417589)
Supplement: Supplementary file 2 [file 1]

1. Foghsgaard, S., et al., *Treatment with the glucagon-like peptide-1 receptor agonist liraglutide improves glycemic control in women with prior gestational diabetes mellitus: A randomized, placebo-controlled trial.* (It has a protocol published in BMJ open)

| Bias                                                      | Authors' judgement | Support for judgement                                                                                                                                                                |
|-----------------------------------------------------------|--------------------|--------------------------------------------------------------------------------------------------------------------------------------------------------------------------------------|
| Random sequence generation (selection bias)               | Low risk           | The randomization will be carried out through a central independent unit through an unblinded data manager at Public Health and Quality Improvement, Central Denmark Region, Denmark |
| Allocation concealment (selection bias)                   | Low risk           | The allocation sequence will be concealed from the investigators and healthcare staff enrolling and assessing participants                                                           |
| Blinding of participants and personnel (performance bias) | Low risk           | Participants, investigators and healthcare staff will remain blinded to the allocated treatment and kept masked until the afternoon of visit 10 (OGTT after 52 weeks).               |
| Blinding of outcome assessment (detection bias)           | Low risk           | Data analysis will be carried out blinded                                                                                                                                            |
| Incomplete outcome data (attrition bias)                  | Unclear risk       | 104 participants at baseline but 83 finished the trial after one year                                                                                                                |
| Selective reporting (reporting bias)                      | Unclear risk       | Secondary outcomes including ALT,AST and so on, but only reported FPG,HbA1c, BW and glucose tolerance                                                                                |
| Other bias                                                | Low risk           | Comment: none detected                                                                                                                                                               |

2. Elkind-Hirsch, K.E., et al., *SHORT-TERM SITAGLIPTIN-METFORMIN THERAPY IS MORE EFFECTIVE THAN METFORMIN OR PLACEBO IN PRIOR GESTATIONAL DIABETIC WOMEN WITH IMPAIRED GLUCOSE REGULATION.*

| Bias                                                      | Authors' judgement | Support for judgement                                                                                                                                                                                                                                                                                  |
|-----------------------------------------------------------|--------------------|--------------------------------------------------------------------------------------------------------------------------------------------------------------------------------------------------------------------------------------------------------------------------------------------------------|
| Random sequence generation (selection bias)               | Low risk           | All subjects were assigned to one of these three groups based on computer-generated random numbers using a block randomization method.                                                                                                                                                                 |
| Allocation concealment (selection bias)                   | Low risk           | The primary investigators were blinded to treatment allocation                                                                                                                                                                                                                                         |
| Blinding of participants and personnel (performance bias) | High risk          | This was a prospective, single-blind, randomized, outpatient clinical trial<br><br>The research coordinator filled color-coded bags (A, B, C,) with 1 of 3 medications (A = P, B = MET, and C = SITA-MET) and dispensed open-label medications to study patients in color-coded bags with instructions |
| Blinding of outcome assessment (detection bias)           | Unclear risk       | This was a single-blind designed trial, and the members who assessed outcomes did not mention                                                                                                                                                                                                          |
| Incomplete outcome data (attrition bias)                  | Low risk           | The trial enrolled 36 participates and all completed the trial for 16 weeks.                                                                                                                                                                                                                           |
| Selective reporting (reporting bias)                      | Unclear risk       | TSH, $\beta$ -hCG, ALT and AST were measured at baseline, but did not report at end-point.                                                                                                                                                                                                             |
| Other bias                                                | Low risk           | Comment: none detected.                                                                                                                                                                                                                                                                                |

3. Hummel, S., et al., *Efficacy of vildagliptin for prevention of postpartum diabetes in women with a recent history of insulin-requiring gestational diabetes: a phase II, randomized, double-blind, placebo-controlled study.*

| Bias                                                      | Authors' judgement | Support for judgement                                                                                                                                    |
|-----------------------------------------------------------|--------------------|----------------------------------------------------------------------------------------------------------------------------------------------------------|
| Random sequence generation (selection bias)               | Unclear risk ▼     | Eligible women were centrally randomized at the baseline visit to receive either 50 mg vildagliptin or placebo, but the randomized method did not report |
| Allocation concealment (selection bias)                   | Low risk ▼         | The participants and investigators were blinded to the allocated treatment                                                                               |
| Blinding of participants and personnel (performance bias) | Low risk ▼         | The trial was a double-blinded and participants and investigators were blinded to allocated treatment.                                                   |
| Blinding of outcome assessment (detection bias)           | Unclear risk ▼     | The details of who assessed the outcome were not reported, but the it was a double-blinded trial                                                         |
| Incomplete outcome data (attrition bias)                  | High risk ▼        | Comment: Participants did not complete the measurements in each time-point                                                                               |
| Selective reporting (reporting bias)                      | Low risk ▼         | Comment: Authors reported outcomes of each measurement.                                                                                                  |
| Other bias                                                | Low risk ▼         | Comment: none detected                                                                                                                                   |

4. Sun, X., et al., *Sitagliptin down-regulates retinol-binding protein 4 and reduces insulin resistance in gestational diabetes mellitus: a randomized and double-blind trial.*

| Bias                                                      | Authors' judgement | Support for judgement                                                                                                                                                                                     |
|-----------------------------------------------------------|--------------------|-----------------------------------------------------------------------------------------------------------------------------------------------------------------------------------------------------------|
| Random sequence generation (selection bias)               | Low risk           | Using a randomization method of permuted-block design stratified according to the baseline FPG levels of each participant                                                                                 |
| Allocation concealment (selection bias)                   | Low risk           | This was a double-blinded trial and both sitagliptin and placebo were supplied as capsules identical in shape and color and in coded bottles to mask their contents to the investigators and participants |
| Blinding of participants and personnel (performance bias) | Low risk           | Both sitagliptin and placebo were supplied as capsules identical in shape and color and in coded bottles to mask their contents to the investigators and participants                                     |
| Blinding of outcome assessment (detection bias)           | Low risk           | All anthropometric assessments were measured at baseline (week 0) and end of trial (week 16) by investigators blind to the randomized group assignment                                                    |
| Incomplete outcome data (attrition bias)                  | Unclear risk       | Comment: 29 participants in experimental group and 28 in controlled group dropped out, and the data of them did not report                                                                                |
| Selective reporting (reporting bias)                      | Low risk           | Comment: Authors reported all the data mentioned in method                                                                                                                                                |
| Other bias                                                | Low risk           | Comment: none detected                                                                                                                                                                                    |
